---

1 **Evaluation of Fecal Immunoassays for Canine *Echinococcus* Infection in China**

2

3

4 Liying Wang<sup>1,5,6,7,8</sup>, Qian Wang<sup>2</sup>, Huixia Cai<sup>3</sup>, Hu Wang<sup>3</sup>, Yan Huang<sup>2</sup>, Yu Feng<sup>4</sup>,  
5 Xuefei Bai<sup>2</sup>, Min Qin<sup>1</sup>, Sylvie Manguin<sup>5</sup>, Laurent Gavotte<sup>6</sup>, Weiping Wu<sup>\*1</sup>, Roger  
6 Frutos<sup>7,8</sup>

7

8 1. National Institute of Parasitic Diseases, Chinese Center for Disease Control and  
9 Prevention; Chinese Center for Tropical Diseases Research; WHO Collaborating  
10 Centre for Tropical Diseases; National Center for International Research on Tropical  
11 Diseases, Ministry of Science and Technology; Key Laboratory of Parasite and  
12 Vector Biology, Ministry of Health, Shanghai 200025, China. 2. Sichuan Provincial  
13 Center for Disease Control and Prevention, Chengdu 610041, China.

14 3. Qinghai Provincial Institute for Endemic Disease Prevention and Control, Xining  
15 811602, China.

16 4. Gansu Provincial Center for Disease Control and Prevention, Lanzhou 730020,  
17 China.

18 5. HydroSciences Montpellier (HSM), Institut de Recherche pour le Développement  
19 (IRD), CNRS, Université Montpellier, 34093 Montpellier, France.

20 6. ISEM, UMR 5557, Université de Montpellier, 34000 Montpellier, France.

21 7. Cirad, UMR 17, Intertryp, Campus international de Baillarguet, 34398 Montpellier  
22 Cedex 5, France.

23 8. IES, Université Montpellier, CNRS, 34059, Montpellier Cedex 5, France.

24 \* Corresponding author

25

26 **Corresponding author**

27 Wei-Ping Wu

28 No. 207 Ruijin Er Road,

29 Shanghai, 200025, P.R. China

30 [wuweiping@hotmail.com](mailto:wuweiping@hotmail.com)

31

32 **Running title:** Assessment of echinococcosis tests

33

34

35

36 **Keywords:** Echinococcosis, *Echinococcus granulosus*, China, Detection, ELISA,  
37 sandwich ELISA, Immunopurification

39 **Abstract**

40

41 Human echinococcosis is present worldwide but it is in China that prevalence is the  
42 highest. Western China and in particular the Tibetan plateau is the region where the  
43 burden of echinococcosis is the most important. Dogs are a major carrier of  
44 echinococcosis and monitoring the presence of *Echinococcus* worms in dogs is  
45 therefore essential for efficiently controlling the disease. Detection kits based on three  
46 different technologies, i.e. sandwich ELISA, ELISA and gold immunodiffusion are  
47 currently marketed and used in China. The objective of this work was to assess the  
48 efficacy of these kits, in particular with respect to sensitivity and specificity. Four  
49 fecal antigen detection kits for canine echinococcosis covering the three technologies  
50 were obtained from companies and tested in parallel on 220 fecal samples. The results  
51 indicate that the performance is lower than expected, in particular in terms of  
52 sensitivity. The best results were obtained with the sandwich ELISA technology. The  
53 gold immunofiltration yielded the poorest results. In all cases, further development is  
54 needed to improve the performance of these kits, which represent a key element for  
55 the control of echinococcosis.

56

57 **Running title:** *Echinococcus* immunoassays

58

59 **Key words:** Echinococcosis, *Echinococcus granulosus*, dog, fecal immunoassays,  
60 sandwich ELISA, ELISA, gold immunofiltration

62 **Author summary**

63

64 Although present worldwide, human echinococcosis is at its highest prevalence in  
65 Western China and particularly on the Tibetan plateau. Controlling echinococcosis is  
66 a national priority and routine monitoring must be established. Dogs are the main  
67 carriers of echinococcosis and surveying *Echinococcus* worms in dogs is therefore a  
68 key issue. Commercial detection kits are currently in use in China for monitoring the  
69 presence of Echinococcosis in dogs. These kits are based on three different  
70 technologies, i.e. sandwich ELISA with two monoclonal antibodies, ELISA, and gold  
71 immunodiffusion. National survey programs are essential for the control of  
72 echinococcosis and it is thus very important to assess the efficacy of these kits,  
73 planned to be used for the national survey programs. The work was thus undertaken to  
74 assess this efficacy, in particular with respect to sensitivity and specificity. Four fecal  
75 antigen detection kits for canine echinococcosis covering the three technologies were  
76 obtained from companies and tested in parallel on 220 fecal samples. The  
77 performance was lower than expected, in particular for their sensitivity, which ranged  
78 from 51.5% to 83.9% with only two samples displaying a worm burden lower than  
79 100. Three out of four kits showed non-specific cross-reactions with other parasites.  
80 The best results were obtained with the sandwich ELISA technology, whereas gold  
81 immunofiltration yielded the poorest results. However, in all cases, further  
82 development is strongly needed to improve the performance of these kits, which  
83 represent a key element for the control of echinococcosis.

85 **1. Introduction**

86

87 Echinococcosis is a health-threatening parasitic zoonotic disease caused by the  
88 larval stage of *Echinococcus* tapeworms [1]. Cystic echinococcosis (CE) and alveolar  
89 echinococcosis (AE) in humans, livestock and small mammals are triggered by the  
90 involuntary consumption of *Echinococcus granulosus* and *Echinococcus*  
91 *multilocularis* eggs, respectively, which are excreted in the feces of the definitive  
92 hosts, i.e. carnivores. Naturally, the transmission occurs between definitive hosts  
93 (primary dogs and foxes) and intermediate hosts (livestock and small mammals),  
94 whilst humans are accidental hosts. Human infection can occur through direct contact  
95 with the definitive host or indirectly through contamination of food or possibly water  
96 with parasite eggs [2]. *Echinococcus granulosus* is distributed worldwide, with only a  
97 few areas such as Iceland, Ireland, and Greenland, which are considered free of  
98 autochthonous human cases [3,4]. *Echinococcus multilocularis* is confined to the  
99 northern hemisphere, but within that range displays a wide distribution [5]. In humans,  
100 metacestode infection causes severe disease and possibly death. It also results in  
101 economic losses from treatment costs, lost wages and livestock-associated production  
102 losses. It has been recognized as one of the world's public health issues.

103

104 Both CE and AE are endemic in the pasture areas of western China, threatening  
105 more than 50 million people with a global echinococcosis prevalence of 0.28% in  
106 humans, 4.68% in livestock and 4.25% in dogs. The number of patients was estimated

107 to be 166,098 [6]. All provinces (autonomous regions, municipalities and special  
108 administrative regions) have recorded cases of echinococcosis. Echinococcosis is  
109 indigenous in endemic provinces and imported in non-endemic provinces.  
110 Echinococcosis has been listed as a key parasitic disease in China [7]. China is  
111 believed to be accountable for 40% of the world CE Disability Adjusted Life Years  
112 (DALYs) [8]. A national control project has been implemented in echinococcosis  
113 endemic areas in western China since 2006. Dog management and monthly treatment  
114 with praziquantel are two major intervention measures implemented to prevent human  
115 and livestock infections. Therefore, the detection of *Echinococcus* infections in dogs  
116 is a very important indicator to assess control efficacy and risk of disease transmission  
117 [9].

118

119       Diagnosis and detection of *Echinococcus granulosus (sensu lato)* infection in  
120 animals is a prerequisite for epidemiological studies and surveillance of  
121 echinococcosis in endemic, re-emergent or emergent transmission zones. Testing dog  
122 fecal samples by coproantigen ELISA, often combined with mass ultrasound  
123 screening programs for human CE, has been the preferred approach for monitoring  
124 and surveillance in resource-poor endemic areas and during control schemes [10].  
125 Dogs infection rates are very high and sensitive indicators to assess the risk and  
126 burden of echinococcosis and to evaluate the effect of control measures [11].

127

128           Currently, 2 sandwich ELISA kits and 1 ELISA test for the detection of  
129 coproantigen as well as a gold immunofiltration assay are commercially available in  
130 China. In this work, we evaluated the relative performance of these four kits  
131 representing three different technologies, in particular sensitivity and specificity, in  
132 the detection of *Echinococcus granulosus* infections in dogs in order to provide a  
133 reference for practical implementation in control projects.

---

135 **2. Materials and methods**

136

137 **2.1. Kits assessed.** This study assessed 4 kits currently used for the prevention and  
138 control of echinococcosis in China. The kits were randomly coded as A, B, C and D.  
139 The information on the kits is provided in Table 1. These kits were provided by  
140 Xinjiang Tecon Animal Husbandry Bio-Technology Co., Ltd, Zhuhai S.E.Z. Haitai  
141 Biological Pharmaceuticals Co.,Ltd. and Shenzhen Combined Biotech Co., Ltd (Table  
142 1). Two kits were sandwich ELISA tests (A and B), one is an ELISA test (D) and one  
143 is a Gold Immunofiltration assay (C) (Table 1).

144

145 **Table 1. Major features of the assessed tests for *Echinococcus granulosus***  
146 **diagnosis in dogs**

147

| Assay code | Assay type            |        | Sample Volumes | Extra supplies | Time required | Product form |     |
|------------|-----------------------|--------|----------------|----------------|---------------|--------------|-----|
| A          | Sandwich MAbs         | ELISA, | 2              | 100 $\mu$ L    | No            | 135 min      | kit |
| B          | Sandwich MAbs         | ELISA, | 2              | 100 $\mu$ L    | No            | 135 min      | kit |
| C          | Gold immunofiltration |        |                | 300 $\mu$ L    | No            | 130 min      | kit |
| D          | ELISA                 |        |                | 100 $\mu$ L    | No            | 150 min      | kit |

148

149 **2.2. Specimen collection.** A total of 34 positive canine fecal specimens were  
150 collected from dogs in Xinjiang, Qinghai and Gansu Positive cases were identified by

151 demonstration of the presence of adult worms in the intestine, which is considered as  
152 the “gold” standard for the identification of *Echinococcus* infections [12]. Hence, we  
153 detected *E. granulosus* through autopsy in 34 specimens with a minimum parasite  
154 load of 5 and a maximum load of 25,000 (Table 2). A complement of 158 negative  
155 canine fecal specimens were collected, out of which 116 were from non-endemic  
156 areas in Gansu and 42 from laboratory dogs without any parasitic infection. An  
157 additional 28 samples of canine fecal specimens were also collected from dogs  
158 displaying other parasitic infections. Eight samples of *Taenia hydatigera*, 8 of  
159 *Dipylidium caninum* and 12 of *Spirometra mansoni*, were collected in the Guangdong  
160 province (Table 3). All specimens were verified by etiologic inspection.



161 **Table 2. Specific parasite load in the 34 positive samples**

| Infection Level | Worm load Range | Number of infected dogs | Worm burden                                       |
|-----------------|-----------------|-------------------------|---------------------------------------------------|
| I               | [0-500]         | 9                       | 5;60;100;200(3);300(2);400                        |
| II              | [500-5,000]     | 10                      | 600(2);1,100;1,500;2,100;3,100 (2);3,500(2);4,000 |
| III             | [5,000-20,000]  | 7                       | 6,000(5);11,000(2)                                |
| IV              | [20,000-+∞]     | 8                       | 20000(3);25000(5)                                 |

162

163

164 **Table 3. Composition and origin of samples**

| Category                                            | Number of dogs sampled                                                                                                 | Sample origin                                                                                                            |
|-----------------------------------------------------|------------------------------------------------------------------------------------------------------------------------|--------------------------------------------------------------------------------------------------------------------------|
| Positive canine fecal specimens                     | 34 ( <i>Echinococcus granulosus</i> infection)                                                                         | Qinghai Center for Disease Control and Prevention and The Animal Husbandry Institute of Xinjiang Uygur Autonomous Region |
| Negative canine fecal specimens                     | 158 (from non-endemic areas in Gansu province)                                                                         | Gansu Center for Disease Control and Prevention                                                                          |
| Canine fecal specimens of other parasitic infection | 28 (including 8 with <i>Taenia hydatigera</i> , 8 with <i>Dipylidium caninum</i> , 12 with <i>Spirometra mansoni</i> ) | Sun Yat-Sen University of Guangdong province                                                                             |

166

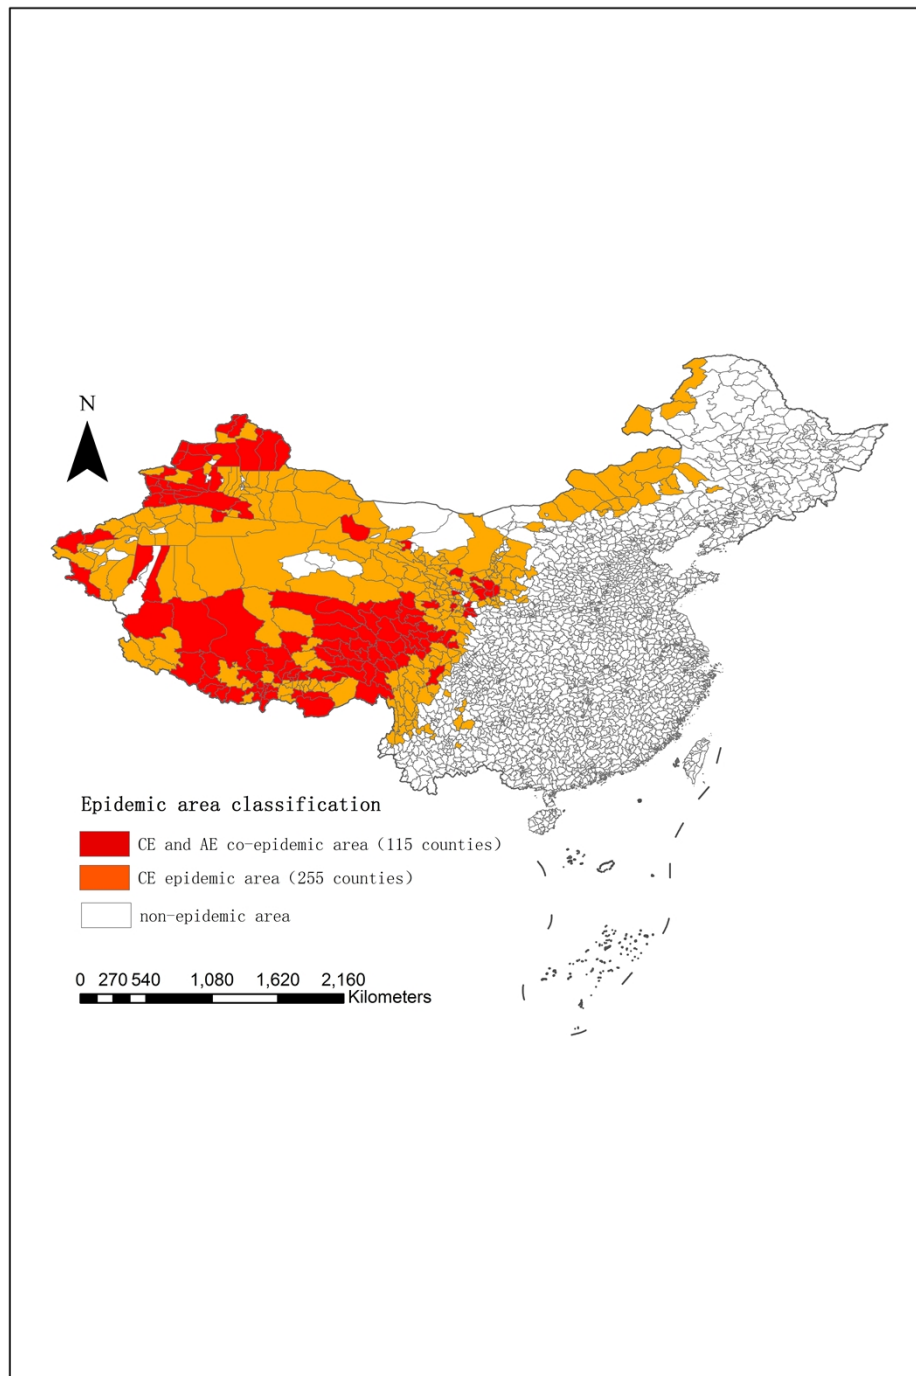

167

168 **Figure 1. Distribution of echinococcosis by county level in China**

169 AE: Alveolar echinococcosis

170 CE: Cystic echinococcosis

171

172 **2.3. Sample preparation.** A double-blind method was used in the detection process.  
173 All information was kept confidential. Experimenters did not know what they were  
174 testing, they only received code numbers as sample identifiers. Each one of the four  
175 kits was handled by a different group. In order to ensure that the concentration of  
176 sample in the different groups was the same, the preliminary preparation of the  
177 samples was performed by the senior experimenter of the organization. Samples were  
178 stored at -80°C upon collection. Fecal specimens were defrosted and 3g of each  
179 sample were diluted in Phosphate Buffer Saline (PBS) at pH 7.2~7.4, to the final  
180 concentration of 1g/mL and centrifuged at 3000 G for 30 minutes. After  
181 centrifugation, 2 mL of supernatant were collected. For two groups of parallel  
182 samples for each test, 6 sample batches of 100 $\mu$ L and 2 sample batches of 300 $\mu$ L  
183 were prepared. In order to avoid any mutual confirmation of results, all samples were  
184 randomly encoded. The information was kept confidential.

185

186 **2.3. Detection tests.** All samples were tested by each kit in double according to the  
187 manufacturer's instructions. The operator of each detection kit was assigned by the  
188 company. Parallel detection tests with the four different kits were conducted  
189 simultaneously in the same laboratory.

190

191 **2.4. Data analysis.** Data were analyzed using the SPSS 20.0 software package (IBM,  
192 Armonk, USA). The indicators considered for analysis were: accuracy, reliability,  
193 sensitivity, specificity, positive predictive value, negative predictive value, Youden's

194 index, cross reaction rate, consistency rate and weighted consistency rate. Data were  
195 tested using a chi-square test. Each index is the average of the test results of two  
196 groups of parallel samples. Definitions and calculation methods of relevant indicators  
197 are as follows.

198 **Sensitivity:** Proportion of known infected fecal samples that tested positive in an  
199 assay (Infected fecal samples that tested negative are considered as false negatives.)

200 **Specificity:** Proportion of uninfected reference fecal samples that tested negative in  
201 an assay. (Uninfected fecal samples that tested positive are regarded as false  
202 positives). This type of specificity is denominated **specificity 1**. Specificity tests  
203 which referring to reference fecal samples not infected with *Echinococcus* but  
204 harboring other parasites is denominated **specificity 2**.

205 **Cross reaction rate:** Proportion of samples uninfected with *Echinococcus* but  
206 harboring other parasites reference fecal samples, which tested positive in an assay.

207 **Positive predictive value (PV+):** PV+ is an indicator of the probability that  
208 individuals with positive testing results do have the disease.

209 **Negative predictive value (PV-):** The PV- is an indicator of the probability that  
210 individuals with negative testing results do not have the disease.

211 **Youden's index:** Youden's index expresses the total ability of a reagent to detect true  
212 positive and true negative samples.

213 **Consistency rate:** Proportion of samples with the same test results of reagents as the  
214 real results.

215 **Kappa Value:** Kappa value is used to analyze and evaluate the consistency of two  
216 parallel samples detected by one detection method. Considering the influence of

217 opportunity factors on consistency rate.

218

219 
$$\text{Sensitivity} = \frac{TP}{TP + FN} \times 100\%_{(1)};$$

220 
$$\text{Specificity} = \frac{TN}{FP + TN} \times 100\%_{(2)};$$

221 
$$PV+ = \frac{TP}{TP + FP} \times 100\%_{(3)};$$

222 
$$PV- = \frac{TN}{TN + FN} \times 100\%_{(4)};$$

223 
$$\text{Youden's index} = \text{Sensitivity} + \text{Specificity} - 1_{(5)};$$

224 
$$\text{Cross reaction rate} = 1 - \text{specificity}_{(6)};$$

225 
$$\text{Consistency rate} = \frac{TP + TN}{N} \times 100\%_{(7)};$$

226 
$$\text{Kappa Value} = \frac{N(TP + TN) - (R1C1 + R2C2)}{N^2 - (R1C1 + R2C2)} \times 100\%_{(8)};$$

227 N: total number of samples; TP: true positive; FP: false positive; TN: true negative;

228 FN: false negative; R1: sum of the first row; R2: sum of the second row;

229 C1: sum of the first column; C2: sum of the second column.

230

231 Sensibility and specificity normality were confirmed by Kolmogorov Smirnov

232 normality test, thereafter significant differences between assays were assessed by

233 Student's T-test.

234

236 **3. Results**

237

238 **3.1 Sensitivity assessment.** The sensitivity of each detection kit was assessed using  
239 the 34 feces obtained from *Echinococcus* infected dogs listed in Table 4. We  
240 randomly selected 2 parallel groups including 34 fecal specimens and calculated the  
241 average as the sensitivity of each detection method. The kit B displayed the highest  
242 average sensitivity, i.e. 83.82%, while D showed the lowest average sensitivity, i.e.  
243 51.47% (Tables 4 and 5). The average sensitivity of kits A and C was 76.47% and  
244 70.59%, respectively. When the sensitivity was calculated according to the worm load,  
245 strong variations were observed (Table 5). The sensitivity varied widely depending on  
246 the worm count. For kit A, the sensibility varied from a lowest of 44.44% for a worm  
247 burden class of 500 or less to a maximum of 100% for a worm burden of 5,000 to  
248 20,000. The sensitivity decreased sharply to 81% for a worm burden above 20,000  
249 (Table 5). For the other three kits the calculated sensitivity increased along with the  
250 worm load. The lowest sensitivity for a worm load below 500 was 72.22%, 44.44%  
251 and 11.11% for kits, B, C and D, respectively (Table 5). The highest sensitivity was  
252 observed for a worm burden above 20,000 with 93.75% for kits B and C, and 81.25%  
253 for kit A and D (Table 5)

254

255 **Table 4. Summary of evaluation results of relevant indicators**

256

257

| Assay code | Randomized ID | Sensitivity       | Specificity         | Positive predictive value | Negative predictive value | Youden's index      | Consistency rate | Kappa value | Repeatedly          |
|------------|---------------|-------------------|---------------------|---------------------------|---------------------------|---------------------|------------------|-------------|---------------------|
| A          | 1             | 82.40%<br>(28/34) | 89.20%<br>(141/158) | 87.97%<br>(28/45)         | 62.22%<br>(28/45)         | 95.92%<br>(141/147) | 0.72             | 88.02%      | 88.18%<br>(194/220) |
|            | 5             | 70.60%<br>(24/34) | 86.70%<br>(137/158) | 57.78%<br>(24/45)         | 53.33%<br>(24/45)         | 94.56%<br>(137/147) | 0.64             | 85.94%      |                     |
| B          | 3             | 82.40%<br>(28/34) | 72.80%<br>(115/158) | 74.68%<br>(28/71)         | 39.44%<br>(28/71)         | 95.04%<br>(115/121) | 0.55             | 74.48%      | 84.55%<br>(186/220) |
|            | 4             | 85.30%<br>(29/34) | 83.82%<br>(121/158) | 41.69%<br>(29/66)         | 43.94%<br>(29/66)         | 95.54%<br>(121/126) | 0.59             | 76.30%      |                     |
| C          | 7             | 67.60%<br>(23/34) | 63.30%<br>(100/158) | 63.61%<br>(23/81)         | 28.40%<br>(23/81)         | 90.09%<br>(100/111) | 0.31             | 64.06%      | 82.73%<br>(182/220) |
|            | 8             | 73.50%<br>(25/34) | 70.59%<br>(101/158) | 29.44%<br>(25/82)         | 30.49%<br>(25/82)         | 90.95%<br>(101/110) | 0.34             | 64.84%      |                     |
| D          | 2             | 52.90%<br>(18/34) | 74.70%<br>(118/158) | 75.63%<br>(18/58)         | 31.03%<br>(18/58)         | 88.06%<br>(118/134) | 0.28             | 70.83%      | 87.73%<br>(193/220) |
|            | 6             | 50.00%<br>(18/34) | 51.47%<br>(118/158) | 31.26%<br>(18/58)         | 31.48%<br>(18/58)         | 87.87%<br>(118/134) | 0.27             | 71.35%      |                     |
|            |               |                   |                     |                           |                           |                     |                  |             |                     |

|         |            |             |             |            |             |            |
|---------|------------|-------------|-------------|------------|-------------|------------|
|         | (17/34)    | (121/158)   | (17/54)     | (121/138)  |             |            |
| Result  | $X^2=9.31$ | $X^2=24.90$ | $X^2=40.20$ | $X^2=9.46$ | $X^2=23.44$ | $X^2=3.68$ |
| p value | $P<0.05$   | $P<0.05$    | $P<0.05$    | $P<0.05$   | $P<0.05$    | $P>0.05$   |

258

259

260

**Table 5. Effect of the worm load sensitivity**

261

| Assay code | Randomized sample ID | Number of positive tests |                 |             |                 |                |                 |             |                 | Total<br>N=34 | Average sensitivity (%) | Number of false negatives | Worm count for false negatives                 |
|------------|----------------------|--------------------------|-----------------|-------------|-----------------|----------------|-----------------|-------------|-----------------|---------------|-------------------------|---------------------------|------------------------------------------------|
|            |                      | [0-500]                  |                 | [500-5,000] |                 | [5,000-20,000] |                 | [20,000-+∞] |                 |               |                         |                           |                                                |
|            |                      | n=9                      | Sensitivity (%) | n=10        | Sensitivity (%) | n=7            | Sensitivity (%) | n=8         | Sensitivity (%) |               |                         |                           |                                                |
| A          | 1                    | 5                        |                 | 9           |                 | 7              | 100.00          | 7           | 81.25           | 28            | 76.47                   | 6                         | 5;60;100;400;1,500;20,000                      |
|            | 5                    | 3                        | 44.44           | 8           | 85.00           | 7              |                 | 6           |                 | 24            |                         | 10                        | 5;60;100;200;300;400;2,100;3,100;20,000;25,000 |
| B          | 3                    | 6                        | 72.22           | 8           | 80.00           | 6              | 92.86           | 8           | 93.75           | 28            | 83.82                   | 6                         | 5;60;200;600(2);11,000                         |
|            | 4                    | 7                        |                 | 8           |                 | 7              |                 | 7           |                 | 29            |                         | 5                         | 60;200;600(2);20,000                           |
| C          | 7                    | 3                        | 44.44           | 7           | 65.00           | 6              | 85.71           | 7           | 93.75           | 23            | 70.59                   | 11                        | 5;100;200(3);400;600(2);1,100;6,000.25,000     |



|   |   |       |       |       |       |       |    |                                                                        |
|---|---|-------|-------|-------|-------|-------|----|------------------------------------------------------------------------|
|   | 8 | 5     | 6     | 6     | 8     | 25    | 9  | 5;100;200(2);600(2);1,100;3,100;6,000                                  |
|   | 2 | 1     | 5     | 5     | 7     | 18    | 16 | 5;60;100;200(3);300;400;600(2);1,500;<br>2,100;3,100;6,000(2);20,000   |
| D |   | 11.11 | 50.00 | 71.43 | 81.25 | 51.47 |    |                                                                        |
|   | 6 | 1     | 5     | 5     | 6     | 17    | 17 | 5;60;100;200(3);300;400;600(2);1,500;<br>2,100;3,100;6000(2);20,000(2) |

263 **3.2. Assessment of false positive answers (specificity 1).** The level of non-specific  
264 reactions was assessed for each detection kit on 158 feces obtained from  
265 *Echinococcus*-negative dogs (Table 4). We randomly selected 2 parallel groups from  
266 the 158 fecal specimens. The lowest level of non-specific reaction was shown by the  
267 kit A, i.e. 12.03%, while the kit C displayed the highest level of non-specificity, i.e.  
268 36.39%. Kits B and D yielded intermediate values, i.e. 25.32% and 24.37%,  
269 respectively (Table 4).

270

271 **3.3. Cross-reactivity assessment with other tapeworms (specificity 2).** Kit A  
272 displayed no cross-reactivity at all with any of the control parasites, i.e. *T. hydatigena*,  
273 *D. caninum*, and *S. mansoni* (Table 6). Kits B and C displayed the highest level of  
274 cross-reactivity, i.e. 23.21%, whereas kit D showed an intermediate level of 16.07%.  
275 Kit C cross-reacted with all three heterologous worms. Kit B showed cross-reactivity  
276 with *D. caninum* and *S. mansoni*, while kit D cross-reacted with *T. hydatigena* and *D.*  
277 *caninum*.

278 **Table 6. Cross-reactivity with other parasites**

279

280

281

282

283

284

285

286

287

| Assay code | Randomized sample ID | Number of positive tests        |                                  |                                   |   | Total<br>N=28 | Cross reaction rate (%) |
|------------|----------------------|---------------------------------|----------------------------------|-----------------------------------|---|---------------|-------------------------|
|            |                      | <i>Taenia hydatigena</i><br>n=8 | <i>Dipylidium caninum</i><br>n=8 | <i>Spirometra mansoni</i><br>n=12 |   |               |                         |
| A          | 1                    | 0                               | 0                                | 0                                 | 0 | 0.00          |                         |
|            | 5                    | 0                               | 0                                | 0                                 | 0 |               |                         |
| B          | 3                    | 0                               | 3                                | 3                                 | 6 | 23.21         |                         |
|            | 4                    | 0                               | 4                                | 3                                 | 7 |               |                         |
| C          | 7                    | 3                               | 2                                | 2                                 | 7 | 23.21         |                         |
|            | 8                    | 6                               | 0                                | 0                                 | 6 |               |                         |
| D          | 2                    | 1                               | 5                                | 0                                 | 6 | 16.07         |                         |
|            | 6                    | 1                               | 2                                | 0                                 | 3 |               |                         |

288

289 **3.4. Assessment of global performance and accuracy.** The best score when using  
290 Youden's index was obtained by kit A (0.64), whereas kit B reached a score of 0.59  
291 (Table 4). Kits C and D obtained very low scores of 0.34 and 0.27, respectively  
292 (Table 4). The Youden's index varies from 0 to 1 with 0 indicating an  
293 undiscriminating, therefore useless test, while 1 is indicating a perfect test. Even with  
294 the best scores, kits A and B were far from being perfect. The accuracy assessment  
295 conducted to evaluate the repeatability of each test yielded scores higher than 80%  
296 whatever the kit considered. However, kits A and D reached a higher score, i.e.  
297 88.18% and 87.73%, respectively, compared to kits B and C, i.e. 84.55% and 82.73%,  
298 respectively.

299

### 300 **3.5. Assessment of differences between assays**

301 The relative difference between assays was assessed using a Student's T-test  
302 following the positive normality assessment of the data sensitivity and specificity. The  
303 difference between kits was also assessed with a student's test. For the sensitivity,  
304 results from kit A are significantly different from those obtained with kits C and D but  
305 not with those from kit B (Table 7). Results from kit B are significantly different from  
306 those from kit C and kit D (Table 7). Results from kit C are not significantly different  
307 from those obtained with Kit D (Table 7). With respect to specificity, results from kit  
308 A are not significantly different from those coming from kits B and C but are  
309 significantly different from those obtained with kit D (Table 8). Kit B yielded results

310 significantly different from those from kits C and D (Table 8). Finally, results from  
311 kits C and D were not significantly different (Table 8).

312

313 **Table 7. Assessment of the results difference for sensitivity**

| Comparisons | DoF | T     | p-value       |
|-------------|-----|-------|---------------|
| A-B         | 2   | 3.23  | 0.084         |
| A-C         | 2   | 6.21  | <b>0.025*</b> |
| A-D         | 2   | 5.96  | <b>0.027*</b> |
| B-C         | 2   | 4.93  | <b>0.038*</b> |
| B-D         | 2   | 4.61  | <b>0.044*</b> |
| C-D         | 2   | -1.70 | 0.232         |

314 \* Significant at 0.05

315 DoF: Degree of Freedom

316

317

318 **Table 8. Assessment of the results difference for specificity**

| Comparisons | DoF | t     | p-value         |
|-------------|-----|-------|-----------------|
| A-B         | 2   | -0.68 | 0.569           |
| A-C         | 2   | 2.24  | 0.155           |
| A-D         | 2   | 4.87  | <b>0.040*</b>   |
| B-C         | 2   | 4.60  | <b>0.044*</b>   |
| B-D         | 2   | 14.45 | <b>0.005***</b> |
| C-D         | 2   | 3.49  | 0.073           |

319 \* Significant at 0.05

320 \*\*\* Significant at 0.01

321 DoF: Degree of Freedom

322

### 324 **3. Discussion**

325

326 China is reporting the highest human prevalence rate of echinococcosis  
327 worldwide. Following the 2012-2016 national survey, 368 out of 413 counties were  
328 identified as endemic for echinococcosis [6]. Currently the number of endemic  
329 counties rose to 370, after the disease was detected in 2017 in Dongxiang County in  
330 Gansu province and in the Ulagai Management District in Inner Mongolia (Figure 1).  
331 The endemic counties spread over 9 provinces or autonomous regions of Tibet,  
332 Sichuan, Qinghai, Xinjiang, Gansu, Ningxia, Inner Mongolia, Yunnan and Shanxi  
333 (Figure 1). The overall detection rate was 0.51% (5,133/1,001,173) [6]. The  
334 prevalence was estimated to be 0.28% in endemic areas and the number of patients  
335 was estimated to be 166,098 with a number of persons at risk of about 60 million [6].  
336 Out of the 370 endemic counties, 158 are located in Qinghai Tibetan Plateau with a  
337 prevalence of 1.28% which is 10 times higher than the prevalence in non-Qinghai  
338 Tibetan Plateau areas, i.e. 0.13% [6].

339

340 These last few years, significant technical progress was made in immunological  
341 diagnosis of *Echinococcus* infection in definitive hosts [13-15]. The detection of  
342 parasite antigens in stool by ELISA has been developed for the detection of fecal  
343 antigen released by canine *Echinococcus* [13,16-18]. *Echinococcus* antigens can be  
344 detected in dog feces 5 to 10 days after being experimentally infected [19]. This  
345 detection becomes negative five days after treatment with praziquantel [19]. The

346 detection of specific antigens in the definitive host stool samples is more informative  
347 than the detection of serum antibodies, because of the higher probability of being  
348 associated with the current infection. Owing to their effectiveness, these tests have  
349 been introduced to local echinococcosis prevention programs where they are currently  
350 being implemented. ELISA has been adopted as the main diagnostic method in place  
351 of the arecoline cathartic method to monitor canine *Echinococcus* infection in control  
352 programs. There is thus a need to evaluate the fecal antigen tests regularly to improve  
353 the quality of monitoring activities and objectively assess prevention effectiveness.

354

355 In this work, we evaluated the accuracy and reliability of four commercial kits  
356 currently in use in China and results showed that the sensitivity of the four kits ranged  
357 between 51.5% and 83.9% only. Out of all the samples tested, only two displayed a  
358 worm burden lower than 100. Therefore, the range of sensitivity obtained in this study  
359 is far below that of 92% to 100% for more than 100 worms reported by previous  
360 studies for fecal antigen detection [13]. A sensitivity ranging from 29% to 79% has  
361 been previously reported for a worm burden lower than 100 worms as determined by  
362 necropsy or arecoline cathartic [18]. This is more in the range of what was observed  
363 in this work but with a worm burden higher than 100. The sensitivity results reported  
364 in this work also indicated that the threshold of 100 is not realistic, which could  
365 explain the variation in results from one report to another. The minimal burden of  
366 worms for assessing sensitivity should be 500. Nevertheless, owing to the quite low  
367 sensitivity observed and to the important variation induced by the worm burden,

368 further modifications and optimization must be conducted to increase the sensitivity  
369 of the kits we tested.

370

371 Non-specific, or false-positive, reactions from the kits tested in our study ranged  
372 from 12.03% to 36.39%, while the cross-reactivity with other parasites ranged from 0  
373 to 23.21%, depending upon the kit. Youden's index is a comprehensive indicator  
374 reflecting the sensitivity and specificity. Under the assumption that sensitivity and  
375 specificity are equally important, the kit with the highest Youden's index is given  
376 priority. In this study, the highest Youden's index was 0.64 for kit A. However, the  
377 positive predictive value changes with the infection rate. In this study, the detection  
378 results corresponding to the infection rate of 17.70% (34/192) were generally low,  
379 indicating the occurrence of false positive results. The consistency rate is the main  
380 index reflecting the reliability of kits, which mainly represents the stability of the  
381 detection ability of kits. The highest consistency rate of kit A is 85.94%. Kappa value  
382 is also an important index to reflect the repeatability of test results. Thus kit A shows  
383 the best reliability in terms of repeatability and stability. Although quite high, there is  
384 still a need for further improvement in particular because of the level of false  
385 positives.

386

387 Out of the three technologies assessed, i.e. Sandwich ELISA, ELISA and  
388 immunofiltration, the latter displayed the lowest performance score. Immunofiltration  
389 has the advantage of being used *in situ* with a simple protocol and with results being



390 immediately available. However, the poor performance displayed by this technology  
391 does not make it a reliable and efficient choice for the monitoring of echinococcosis.  
392 More developments are needed to improve this technology. This study shows clearly  
393 that sandwich ELISA should be the methodology to implement for the surveillance of  
394 canine echinococcosis. Kit A displayed the best weighted overall score but kit B  
395 yielded a weighted overall score close to the former. Both were based on the  
396 technology of sandwich ELISA with two monoclonal antibodies.

397

398 ELISA showed performances intermediate between sandwich ELISA and  
399 immunofiltration and does not appear as a reliable option for surveillance.  
400 Nevertheless, even if sandwich ELISA seems to be the technology of choice for the  
401 surveillance of canine echinococcosis, improvements and optimization are still needed  
402 to ensure proper surveillance. This study provides a reference for improving control  
403 measures and assessment of the prevalence of echinococcosis in the endemic counties  
404 of China. This is a key step towards elimination. Since the most sensitive indicator of  
405 the risk of epidemic is the dog infection rate, these kits are tools of primary  
406 importance. Therefore, we urge manufacturers to strengthen research on their  
407 products in order to improve and enhance their overall quality, and in particular  
408 sensitivity and specificity, for effective *Echinococcus* diagnosis and control  
409 implementation in China.

411 **Acknowledgements**

412 The authors are very grateful to Xinyu Duan from the first affiliated hospital of  
413 Xinjiang Medical University, Xuchu Hu from Sun yat-sen University Guangzhou  
414 Province, Zhuangzhi Zhang from the Animal Husbandry Institute of Xinjiang Uygur  
415 Autonomous Region, Yu Feng from Gansu Provincial Center for Disease Control and  
416 Prevention, Lanzhou, China. and Xiumin Han from Qinghai Provincial People's  
417 Hospital, for their kind help in providing samples.

418

419 **Funding**

420 The work was supported by the National Natural Science Foundation of China (No.  
421 81703281) and the Key Laboratory of Echinococcosis Prevention and Control,  
422 National Health Commission, China.

423

424 **Conflict of interest**

425 The authors declared no competing interests.

426

427 **Authors participation**

428 Conceived the study: Weiping Wu, Liying Wang, Hu Wang, Qian Wang

429 Designed the study: Liying Wang

430 Coordination of units: Weiping Wu

431 Collected samples and information: Liying Wang

432 Performed pre-experiment: Huixia Cai

433 Organization of the work: Liying Wang, Weiping Wu

434 Supervision: Qian Wang, Hu Wang, Yan Huang, Yu Feng

435 Data analysis: Liying Wang, Min Qin, Laurent Gavotte, Roger Frutos

436 Writing-original draft: Liying Wang, Xuefei Bai, Min Qin

437 Writing-reviewing and editing: Sylvie Manguin, Laurent Gavotte, Roger Frutos

438 All authors read and approved the final manuscript.

439

441 **References**

442

443 1. Vuitton DA, McManus DP, Rogan MT, Romig T, Gottstein B, Naidich A, et al.  
444 International consensus on terminology to be used in the field of echinococcoses.  
445 Parasite. 2020;27:41.

446

447 2. Wen H, Vuitton L, Tuxun T, Li J, Vuitton DA, Zhang W, et al. Echinococcosis:  
448 Advances in the 21st century. Clin Microbiol Rev. 2019;32:1-39.

449

450 3. Craig PS, Rogan MT, Allan JC. Detection, screening and community epidemiology  
451 of taeniid cestode zoonoses: cystic echinococcosis, alveolar echinococcosis and  
452 neurocysticercosis. Adv Parasitol. 1996;38:169-250.

453

454 4. Eckert J, Thompson RC. Historical Aspects of Echinococcosis. Adv Parasitol.  
455 2017;95:1-64.

456

457 5. Deplazes P, Rinaldi L, Alvarez Rojas CA, Torgerson PR, Harandi MF, Romig T, et  
458 al. Global Distribution of Alveolar and Cystic Echinococcosis. Adv Parasitol.  
459 2017;95:315-493.

460

461 6. Wu WP, Wang H, Wang Q, Zhou XN, Wang LY, Zheng CJ, et al. A nationwide  
462 sampling survey on echinococcosis in China during 2012-2016, Chin J Parasitol  
463 Parasit. 2018;36:1-14. (in chinese) <http://www.jsczz.cn/CN/Y2018/V36/I1/1>

464

465 7. Li B, Quzhen G, Xue CZ, Han S, Chen WQ, Yan XL, et al. Epidemiological survey  
466 of echinococcosis in Tibet Autonomous Region of China. Infect Dis Poverty.  
467 2019;8:29.

468

469 8. Fasihi Harandi M, Budke CM, Rostami S. The monetary burden of cystic

- 470 echinococcosis in Iran. PLoS Negl Trop Dis. 2012;6:e1915.
- 471
- 472 9. Craig PS, Giraudoux P, Wang ZH, Wang Q. Echinococcosis transmission on the  
473 Tibetan Plateau. Adv Parasitol. 2019;104:165-246.
- 474
- 475 10. Craig P, Mastin A, van Kesteren F, Boufana B. *Echinococcus granulosus*:  
476 Epidemiology and state-of-the-art of diagnostics in animals. Vet  
477 Parasitol.2015;213:132-148.
- 478
- 479 11. Craig PS, Hegglin D, Lightowlers MW, Torgerson PR, Wang Q. Echinococcosis:  
480 Control and Prevention. Adv Parasitol. 2017;96:55-158.
- 481
- 482 12. Otero-Abad B, Torgerson PR. A systematic review of the epidemiology of  
483 echinococcosis in domestic and wild animals. PLoS Negl Trop Dis. 2013;7:e2249.
- 484
- 485 13. Zoljargal P, Ganzorig S, Nonaka N, Oku Y, Kamiya M. A survey of canine  
486 echinococcosis in Gobi Altai Province of Mongolia by coproantigen detection. Jpn J  
487 Vet Res. 2001;49(2):125-129.
- 488
- 489 14. Nonaka N, Oka M, Kamiya M, Oku Y. A latex agglutination test for the detection  
490 of *Echinococcus multilocularis* coproantigen in the definitive hosts. Vet Parasitol.  
491 2008;152:278-283.
- 492
- 493 15. Machnicka B, Dziemian E, Rocki B, Kołodziej-Sobocińska M. Detection of  
494 *Echinococcus multilocularis* antigens in faeces by ELISA. Parasitol Res.  
495 2003;91:491-496.
- 496
- 497 16. Ahmad G, Nizami WA. Coproantigens: early detection and suitability of an  
498 immunodiagnostic method for echinococcosis in dogs. Vet  
499 Parasitol.1998;77:237-244.

500

501 17. Allan JC, Craig PS, Garcia Noval J, Mencos F, Liu D, Wang Y, Wen H, et al.  
502 Coproantigen detection for immunodiagnosis of echinococcosis and taeniasis in dogs  
503 and humans. *Parasitology*. 1992;104 :347-356.

504

505 18. Craig PS, Gasser RB, Parada L, Cabrera P, Parietti S, Borgues C, et al. Diagnosis  
506 of canine echinococcosis: comparison of coproantigen and serum antibody tests with  
507 arecoline purgation in Uruguay. *Vet Parasitol*. 1995;56:293-301.

508

509 19. Deplazes P, Gottstein B, Eckert J, Jenkins DJ, Ewald D, Jimenez-Palacios S.  
510 Detection of *Echinococcus* coproantigens by enzyme-linked immunosorbent assay in  
511 dogs, dingoes and foxes. *Parasitol Res*.1992;78:303-308.

512

513
